# Supplementary material
Source: PubMed Central journal article supplement (PMC6054356)

**Supplemental Figure 1.** Bland-Altman analysis of Iohexol-VFI mGFR showing significant agreement between the two measurements. Mean difference was -0.49 ml/min (95% confidence interval -3.65,+2.68)

**Supplemental Figure 2.** Normalized comparison of the GFR curves for a normal (solid line) and a CKD stage 4 subject (dashed line)

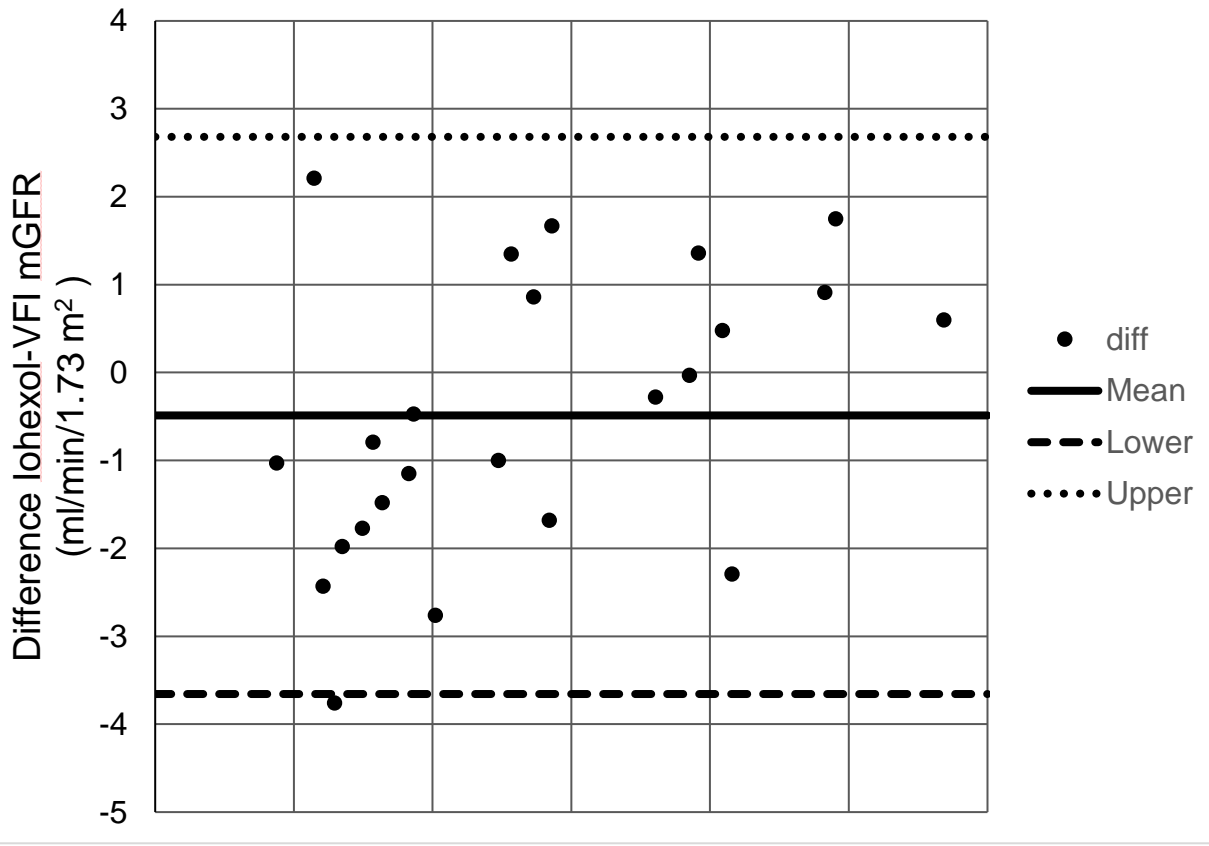

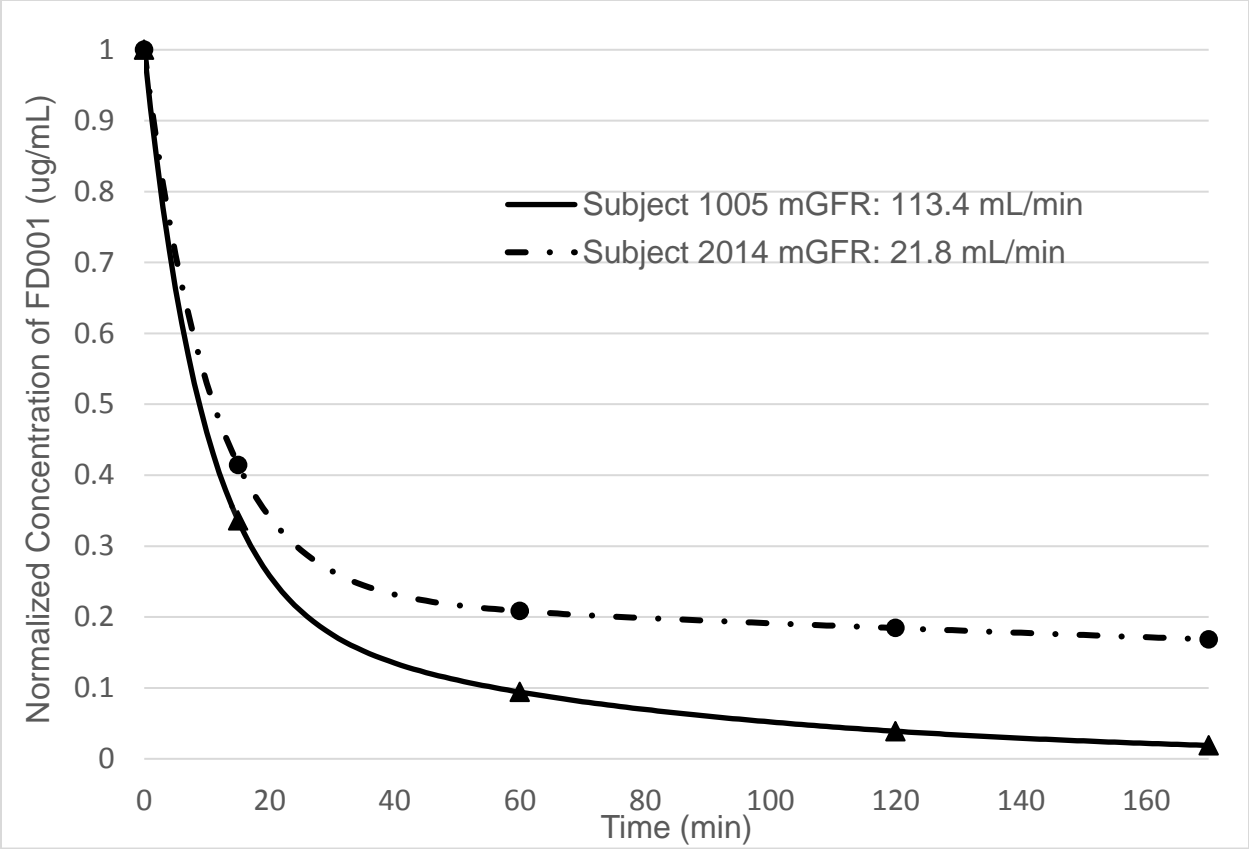

Supplement: ASN.2018020160SupplementaryData2.pdf [file ASN.2018020160SupplementaryData2.pdf]
